# Supplementary material for: The impact of prior BS on cardiac surgery outcomes in patients with type 2 diabetes mellitus: a retrospective analysis of the nationwide inpatient sample
Source: Research Square preprint supplement (doi:10.21203/rs.3.rs-8543784/v1), 2026-02-12
Supplement: Supplementary file 1 [file 258012af3a3dad9667b168ff.docx]

**Table 1** Variables used in binary logistic regression analysis

| **Variables Categories** | **Specific Variables** |
| --- | --- |
| **Patient demographics** | Age (≤64 years and ≥65 years), sex (male and female), race (White, Black, Hispanic, Asian or Pacific Islander, native American, other), charlson comorbidity index (CCI) (1, 2, ≥3), quarter of admission (1-3, 4-6, 7-9, 10-12), admission day is a weekend, smoke, median household income national quartile for patient zip code (0-25, 26-50, 51-75, 76-100) |
| **Hospital characteristics** | Type of admission (non-elective, elective), bed size of hospital (small, medium, large), teaching status of hospital (nonteaching, teaching), location of hospital (rural, urban), type of insure (medicare, medicaid, private insurance, self-pay, no charge, other), region of hospital (northeast, Midwest or north central, south, west) |
| **Comorbidities** | Acquired immune deficiency syndrome, Alcohol abuse, deficiency anemias, chronic blood loss anemia, metastatic cancer, coagulopathy, depression, drug abuse, heart failure, liver disease, chronic pulmonary disease, other neurological disorders, paralysis, peripheral vascular disease, pulmonary circulation disease, hypothyroidism, other thyroid disorders, peptic ulcer disease, valvular disease, renal failure, hypertension, solid tumor without metastasis, coronary artery disease, previous myocardial infarction, previous PCI, aortic valve disease, congenital heart disease, rheumatic heart disease, prior stroke, obstructive sleep apnea, smoking |

CCI : Charlson Comorbidity Index, PCI : Percutaneous coronary intervention

**Table 2** Comparison of baseline characteristics between patients with prior BS and morbid obesity (2020-2022)

|  | | **Before Propensity Score Matching** | | | **After Propensity Score Matching** | | |
| --- | --- | --- | --- | --- | --- | --- | --- |
| **Characteristics** | | **Morbid obesity** | **Patients with prior BS** | ***P*** | **Morbid obesity** | **Patients with prior BS** | ***P*** |
| **Total (n=count)** | | 101,403 | 3884 |  | 3866 | 3866 |  |
| **Age (years, median )** | | 63 (54, 71) | 65 (57, 72) | <0.05 | 64 (55, 72) | 65 (57, 72) | <0.05 |
| **Age group (%)** | |  |  |  |  |  |  |
|  | ≤64 | 54,666 (53.9%) | 1932 (49.7%) | <0.05 | 1936 (50.1%) | 1925 (49.8%) | 0.80 |
|  | ≥65 | 46,737 (46.1%) | 1952 (50.3%) | 1930 (49.9%) | 1941 (50.2%) |
| **Sex (%)** | |  |  |  |  |  |  |
|  | Male | 48,623 (48.0%) | 1448 (37.3%) | <0.05 | 1446 (37.4%) | 1445 (37.4%) | 0.98 |
|  | Female | 52,780 (52.0%) | 2436 (62.7%) | 2420 (62.6%) | 2421 (62.6%) |
| **Race (%)** | |  |  |  |  |  |  |
|  | White | 68,485 (67.5%) | 2879 (74.1%) | <0.05 | 2851 (73.7%) | 2862 (74.0%) | 0.47 |
|  | Black | 18,414 (18.2%) | 542 (14.0%) | 537 (13.9%) | 541 (14.0%) |
|  | Hispanic | 10,258 (10.1%) | 340 (8.8%) | 355 (9.2%) | 340 (8.8%) |
|  | Asian or Pacific Islander | 1305 (1.3%) | 29 (0.7%) | 40 (1.0%) | 29 (0.8%) |
|  | Native American | 874 (0.9%) | 20 (0.5%) | 25 (0.6%) | 20 (0.5%) |
|  | Other | 2067 (2.0%) | 74 (1.9%) | 58 (1.5%) | 74 (1.9%) |
| **CCI (%)** | |  |  |  |  |  |  |
|  | 1 | 570 (0.6%) | 21 (0.5%) | 0.85 | 26 (0.7%) | 21 (0.5%) | 0.37 |
|  | 2 | 2369 (2.3%) | 96 (2.5%) | 112 (2.9%) | 95 (2.5%) |
|  | ≥3 | 98,464 (97.1%) | 3767 (97.0%) | 3728 (96.4%) | 3750 (97.0%) |
| **Quarter of admission (%)** | |  |  |  |  |  |  |
|  | 1-3 | 25,680 (25.3%) | 918 (23.6%) | 0.10 | 943 (24.4%) | 915 (23.7%) | 0.53 |
|  | 4-6 | 24,572 (24.2%) | 973 (25.1%) | 948 (24.5%) | 970 (25.1%) |
|  | 7-9 | 25,578 (25.2%) | 1011 (26.0%) | 963 (24.9%) | 1005 (26.0%) |
|  | 10-12 | 25,573 (25.2%) | 982 (25.3%) | 1012 (26.2%) | 976 (25.2%) |
| **Admission day is a weekend (%)** | |  |  |  |  |  |  |
|  | NO | 79,596 (78.5%) | 3196 (82.3%) | <0.05 | 3136 (81.1%) | 3180 (82.3%) | 0.20 |
|  | YES | 21,807 (21.5%) | 688 (17.7%) | 730 (18.9%) | 686 (17.7%) |
| **Smoke (%)** | |  |  |  |  |  |  |
|  | NO | 81,719 (80.6%) | 2695 (69.4%) | <0.05 | 2713 (70.2%) | 2686 (69.5%) | 0.50 |
|  | YES | 19,684 (19.4%) | 1189 (30.6%) | 1153 (29.8%) | 1180 (30.5%) |
| **Median household income national quartile patient zip code (%)** | |  | |  |  |  |  |
|  | 0-25 | 35,942 (35.4%) | 1048 (27.0%) | <0.05 | 1046 (27.1%) | 1044 (27.0%) | 0.85 |
|  | 26-50 | 28,708 (28.3%) | 1051 (27.1%) | 1057 (27.3%) | 1042 (27.0%) |
|  | 51-75 | 22,673 (22.4%) | 1012 (26.1%) | 1023 (26.5%) | 1010 (26.1%) |
|  | 76-100 | 14,080 (13.9%) | 773 (19.9%) | 740 (19.1%) | 770 (19.9%) |
| Continue | | | | | | | |
|  | | **Before Propensity Score Matching** | | | **After Propensity Score Matching** | | |
| **Characteristics** | | **Morbid obesity** | **Patients with prior BS** | ***P*** | **Morbid obesity** | **Patients with prior BS** | ***P*** |
| **Type of admission (%)** | |  |  |  |  |  |  |
|  | Non-elective | 87,561 (86.3%) | 2962 (76.3%) | <0.05 | 2972 (76.9%) | 2956 (76.5%) | 0.67 |
|  | elective | 13,842 (13.7%) | 922 (23.7%) | 894 (23.1%) | 910 (23.5%) |
| **Bed size of hospital (%)** | |  |  |  |  |  |  |
|  | Small | 18,926 (18.7%) | 682 (17.6%) | <0.05 | 635 (16.4%) | 680 (17.6%) | <0.05 |
|  | Medium | 28,434 (28.0%) | 937 (24.1%) | 1065 (27.5%) | 935 (24.2%) |
|  | Large | 54,043 (53.3%) | 2265 (58.3%) | 2166 (56.0%) | 2251 (58.2%) |
| **Teaching status of hospital (%)** | |  |  |  |  |  |  |
|  | Nonteaching | 23,829 (23.5%) | 707 (18.2%) | <0.05 | 679 (17.6%) | 704 (18.2%) | 0.46 |
|  | Teaching | 77,574 (76.5%) | 3177 (81.8%) | 3187 (82.4%) | 3162 (81.8%) |
| **Location of hospital** | |  |  |  |  |  |  |
|  | Rural | 6461 (6.4%) | 184 (4.7%) | <0.05 | 197 (5.1%) | 184 (4.8%) | 0.50 |
|  | Urban | 94,942 (93.6%) | 3700 (95.3%) | 3669 (94.9%) | 3682 (95.2%) |
| **Type of insure (%)** | |  |  |  |  |  |  |
|  | Medicare | 57,612 (56.8%) | 2371 (61.0%) | <0.05 | 2268 (58.7%) | 2357 (61.0%) | <0.05 |
|  | Medicaid | 15,076 (14.9%) | 327 (8.4%) | 480 (12.4%) | 326 (8.4%) |
|  | Private insurance | 23,416 (23.1%) | 1049 (27.0%) | 955 (24.7%) | 1047 (27.1%) |
|  | Self-pay | 2470 (2.4%) | 43 (1.1%) | 82 (2.1%) | 43 (1.1%) |
|  | No charge | 179 (0.2%) | 2 (0.1%) | 5 (0.1%) | 2 (0.1%) |
|  | Other | 2650 (2.6%) | 92 (2.4%) | 76 (2.0%) | 91 (2.4%) |
| **Region of hospital (%)** | |  |  |  |  |  |  |
|  | Northeast | 14,187 (14.0%) | 669 (17.2%) | <0.05 | 629 (16.3%) | 668 (17.3%) | 0.05 |
|  | Midwest or North Central | 26,479 (26.1%) | 1050 (27.0%) | 1058 (27.4%) | 1043 (27.0%) |
|  | South | 42,336 (41.8%) | 1431 (36.8%) | 1515 (39.2%) | 1421 (36.8%) |
|  | West | 18,401 (18.1%) | 734 (18.9%) | 664 (17.2%) | 734 (19.0%) |

BS: Bariatric Surgery, CCI: Charlson Comorbidity Index

**Table 3** Perioperative comorbidities of study cohorts

|  | **Before Propensity Score Matching** | | | **After Propensity Score Matching** | | |
| --- | --- | --- | --- | --- | --- | --- |
| **Comorbidities** | **Morbid obesity** | **Patients with prior BS** | ***P*** | **Morbid obesity** | **Patients with prior BS** | ***P*** |
| Acquired immune deficiency syndrome | 315 (0.3%) | 14 (0.4%) | 0.59 | 13 (0.3%) | 14 (0.4%) | 0.85 |
| Alcohol abuse | 1548 (1.5%) | 85 (2.2%) | <0.05 | 86 (2.2%) | 83 (2.1%) | 0.82 |
| Deficiency anemias | 34,075 (33.6%) | 1413 (36.4%) | <0.05 | 1416 (36.6%) | 1403 (36.3%) | 0.76 |
| Chronic blood loss anemia | 913 (0.9%) | 41 (1.1%) | 0.32 | 43 (1.1%) | 40 (1.0%) | 0.74 |
| Metastatic cancer | 1657 (1.6%) | 54 (1.4%) | 0.24 | 50 (1.3%) | 54 (1.4%) | 0.69 |
| Coagulopathy | 16,876 (16.6%) | 575 (14.8%) | <0.05 | 550 (14.2%) | 574 (14.8%) | 0.44 |
| Depression | 15,445 (15.2%) | 919 (23.7%) | <0.05 | 883 (22.8%) | 909 (23.5%) | 0.48 |
| Drug abuse | 2998 (3.0%) | 119 (3.1%) | 0.70 | 116 (3.0%) | 118 (3.1%) | 0.89 |
| Heart failure | 51,898 (51.2%) | 1205 (31.0%) | <0.05 | 1179 (30.5%) | 1203 (31.1%) | 0.55 |
| Liver disease | 8764 (8.6%) | 291 (7.5%) | <0.05 | 271 (7.0%) | 291 (7.5%) | 0.38 |
| Chronic pulmonary disease | 32,626 (32.2%) | 858 (22.1%) | <0.05 | 831 (21.5%) | 855 (22.1%) | 0.51 |
| Other neurological disorders | 19,213 (18.9%) | 436 (11.2%) | <0.05 | 433 (11.2%) | 436 (11.3%) | 0.91 |
| Paralysis | 5554 (5.5%) | 178 (4.6%) | <0.05 | 177 (4.6%) | 177 (4.6%) | 1.00 |
| Peripheral vascular disease | 7173 (7.1%) | 299 (7.7%) | <0.05 | 296 (7.7%) | 296 (7.7%) | 1.00 |
| Pulmonary circulation disease | 12,171 (12.0%) | 235 (6.1%) | <0.05 | 204 (5.3%) | 235 (6.1%) | 0.13 |
| Hypothyroidism | 17,800 (17.6%) | 901 (23.2%) | <0.05 | 914 (23.6%) | 890 (23.0%) | 0.52 |
| Other thyroid disorders | 1408 (1.4%) | 68 (1.8%) | 0.06 | 63 (1.6%) | 68 (1.8%) | 0.66 |
| Peptic ulcer disease | 1670 (1.6%) | 198 (5.1%) | <0.05 | 177 (4.6%) | 186 (4.8%) | 0.63 |
| Valvular disease | 15,325 (15.1%) | 654 (16.8%) | <0.05 | 646 (16.7%) | 650 (16.8%) | 0.90 |
| Renal failure | 42,894 (42.3%) | 1312 (33.8%) | <0.05 | 1351 (34.9%) | 1307 (33.8%) | 0.29 |
| Hypertension | 40,805 (40.2%) | 2025 (52.1%) | <0.05 | 2043 (52.8%) | 2018 (52.2%) | 0.57 |
| Solid tumor without metastasis | 2706 (2.7%) | 88 (2.3%) | 0.13 | 82 (2.1%) | 88 (2.3%) | 0.64 |
| Coronary artery disease | 42,253 (41.7%) | 1777 (45.8%) | <0.05 | 1736 (44.9%) | 1766 (45.7%) | 0.49 |
| Previous myocardial infarction | 9411 (9.3%) | 454 (11.7%) | <0.05 | 429 (11.1%) | 450 (11.6%) | 0.45 |
| Previous PCI | 8432 (8.3%) | 558 (14.4%) | <0.05 | 547 (14.1%) | 550 (14.2%) | 0.92 |
| Aortic valve disease | 8030 (7.9%) | 330 (8.5%) | 0.19 | 346 (8.9%) | 329 (8.5%) | 0.49 |
| Atherosclerotic disease | 41,600 (41.0%) | 1763 (45.4%) | <0.05 | 1715 (44.4%) | 1752 (45.3%) | 0.40 |
| Congenital heart disease | 52,926 (52.2%) | 2072 (53.3%) | 0.16 | 2006 (51.9%) | 2061 (53.3%) | 0.21 |
| Rheumatic heart disease | 51,543(50.8%) | 1220(31.4%) | <0.05 | 1190 (30.8%) | 1217 (31.5%) | 0.51 |
| Prior stroke | 5887 (5.8%) | 412 (10.6%) | <0.05 | 413 (10.7%) | 406 (10.5%) | 0.80 |
| Obstructive sleep apnea | 32,966 (32.5%) | 991 (25.5%) | <0.05 | 921 (23.8%) | 988 (25.6%) | 0.08 |
| Smoking | 31,881 (31.4%) | 1567 (40.3%) | <0.05 | 1528 (39.5%) | 1556 (40.2%) | 0.52 |

BS: Bariatric surgery, PCI: Percutaneous Coronary Intervention

**Table 4** Perioperative complications of study cohorts

|  | **Before Propensity Score Matching** | | | **After Propensity Score Matching** | | |
| --- | --- | --- | --- | --- | --- | --- |
| **Comorbidities** | **Morbid obesity** | **Patients with prior BS** | ***P*** | **Morbid obesity** | **Patients with prior BS** | ***P*** |
| Died during hospitalization | 12,305 (12.1%) | 223 (5.7%) | <0.05 | 365 (9.4%) | 223 (5.8%) | <0.05 |
| AKI | 48,736 (48.1%) | 1068 (27.5%) | <0.05 | 1520 (39.3%) | 1066 (27.6%) | <0.05 |
| AMI | 18,663 (18.4%) | 548 (14.1%) | <0.05 | 671 (17.4%) | 547 (14.1%) | <0.05 |
| Pneumonia | 17,178 (16.9%) | 268 (6.9%) | <0.05 | 420 (10.9%) | 268 (6.9%) | <0.05 |
| Stroke | 3181 (3.1%) | 97 (2.5%) | <0.05 | 129 (3.3%) | 97 (2.5%) | <0.05 |
| Atrial fibrillation | 22,360 (22.1%) | 834 (21.5%) | 0.39 | 780 (20.2%) | 829 (21.4%) | 0.17 |
| Ventricular flutter /fibrillation | 1538 (1.5%) | 49 (1.3%) | 0.20 | 30 (0.8%) | 49 (1.3%) | <0.05 |
| Postprocedural cardiogenic shock | 305 (0.3%) | 3 (0.1%) | <0.05 | 12 (0.3%) | 3 (0.1%) | <0.05 |
| Pacemaker implantation | 4551 (4.5%) | 195 (5.0%) | 0.12 | 163 (4.2%) | 195 (5.0%) | 0.08 |
| Wound infection | 1573 (1.6%) | 116 (3.0%) | <0.05 | 80 (2.1%) | 114 (2.9%) | <0.05 |
| DVT | 3391 (3.3%) | 100 (2.6%) | <0.05 | 112 (2.9%) | 100 (2.6%) | 0.40 |
| PE | 3012 (3.0%) | 75 (1.9%) | <0.05 | 107 (2.8%) | 75 (1.9%) | <0.05 |
| Hemorrhage seroma hematoma | 708 (0.7%) | 34 (0.9%) | 0.20 | 26 (0.7%) | 34 (0.9%) | 0.30 |
| Postoperative shock | 551 (0.5%) | 15 (0.4%) | 0.19 | 24 (0.6%) | 15 (0.4%) | 0.15 |
| Sepsis | 29,978 (29.6%) | 651 (16.8%) | <0.05 | 955 (24.7%) | 650 (16.8%) | <0.05 |

BS: Bariatric Surgery, AKI: Acute Kidney Injury, AMI: Acute Myocardial Infarction, DVT: Deep Venous Thrombosis, PE: Pulmonary Embolism

**Table 5 A**djusted odds ratios of perioperative complications

| **Complications** | | **Univariate Analysis** | | | **Multivariate Logistic Regression** | | |
| --- | --- | --- | --- | --- | --- | --- | --- |
| **Morbid obesity** | **Patients with prior BS** | ***P*** | **OR** | **95% CI** | ***P*** |
| **Medical complications** | |  |  |  |  |  |  |
|  | Died during hospitalization | 365 (9.4%) | 223 (5.8%) | <0.05 | 0.59 | 0.50 - 0.71 | ＜0.05 |
|  | AKI | 1520 (39.3%) | 1066 (27.6%) | <0.05 | 0.59 | 0.54 - 0.65 | ＜0.05 |
|  | AMI | 671 (17.4%) | 547 (14.1%) | <0.05 | 0.79 | 0.70 - 0.90 | ＜0.05 |
|  | Pneumonia | 420 (10.9%) | 268 (6.9%) | <0.05 | 0.62 | 0.53 - 0.72 | ＜0.05 |
|  | Stroke | 129 (3.3%) | 97 (2.5%) | <0.05 | 0.76 | 0.58 - 0.99 | <0.05 |
|  | Atrial-Fibrillation | 780 (20.2%) | 829 (21.4%) | 0.17 | 1.06 | 0.95 - 1.18 | 0.31 |
|  | DVT | 112 (2.9%) | 100 (2.6%) | 0.40 | 0.89 | 0.67 - 1.17 | 0.39 |
|  | PE | 107 (2.8%) | 75 (1.9%) | <0.05 | 0.72 | 0.53 - 0.97 | <0.05 |
|  | Sepsis | 955 (24.7%) | 650 (16.8%) | <0.05 | 0.62 | 0.56 - 0.70 | <0.05 |
| **Surgical complications** | |  |  |  |  |  |  |
|  | Post Procedural Cardiogenic Shock | 12 (0.3%) | 3 (0.1%) | <0.05 | 0.23 | 0.06 - 0.81 | <0.05 |
|  | Pacemaker Implantation | 955 (24.7%) | 650 (16.8%) | <0.05 | 1.19 | 0.96 - 1.47 | 0.12 |
|  | Wound infection | 80 (2.1%) | 114 (2.9%) | <0.05 | 1.40 | 1.05 - 1.88 | <0.05 |
|  | Hemorrhage/seroma/hematoma | 26 (0.7%) | 34 (0.9%) | 0.30 | 1.29 | 0.77 - 2.15 | 0.34 |
|  | Postoperative_shock | 24 (0.6%) | 15 (0.4%) | 0.15 | 0.60 | 0.31 - 1.14 | 0.12 |

BS: Bariatric Surgery, OR: Odds Ratio, CI: Confidence Interval, AKI: Acute Kidney Injury, AMI: Acute Myocardial Infarction, DVT: Deep Venous Thrombosis, PE: Pulmonary Embolism, CI: Confidence Interval
