# Supplementary material for: The impact of prior BS on cardiac surgery outcomes in patients with type 2 diabetes mellitus: a retrospective analysis of the nationwide inpatient sample
Source: Research Square preprint supplement (doi:10.21203/rs.3.rs-8543784/v1), 2026-02-12
Supplement: Supplementary file 2 [file b077b9b1aca459930a592492.xlsx]

## Sheet: Sheet1
ICD	ICD10
Cardiac Surgery	0210083/0210088/0210089/021008C/021008F/021008W/0210093/0210098/0210099/021009C/021009F/021009W/02100A3/02100A8/02100A9/02100AC/02100AF/02100AW/02100J3/02100J8/02100J9/02100JC/02100JF/02100JW/02100K3/02100K8/02100K9/02100KC/02100KF/02100KW/02100Z3/02100Z8/02100Z9/02100ZC/02100ZF/0210444/0210483/0210488/0210489/021048C/021048F/021048W/0210493/0210498/0210499/021049C/021049F/021049W/02104A3/02104A8…
Coagulopathy	D65/D68.x/ D69.1/ D69.3/D69.6
Acute heart failure	I5031/ I5033/ I5041/ I5043/ I50811/ I50813
Liver disease	K700/ K701/ K7010/ K7011/ K702/ K703/ K7030/ K7031/ K704/ K7040/ K7041/ K709/ Q898/ Q446/ I820/ R160/ K7460/ K710/ K711/ K7110/ K7111/ K712/ K713/ K714/ K715/ K7150/ K7151/ K716/ K717/ K718/ K719/ K760/ K761/ K762/ K763/ K764/ K765/ K766/ K767/ K768/ K7681/ K7689/ K769
Chronic renal failure	I120/ I1131/ N032/ N033/ N034/ N035/ N036/ N037/ N052/ N053/ N054/ N055/ N056/ N057/ N18/ N19/ N250/ Z490/ Z491/ Z492/ Z940/ Z992
Hypertension	I10.x/ I11.0/ I11.9
Coronary artery disease	I09.9/ I11.0/ I13.0/ I13.2/ I25.5/ I42.0/ I42.5-I42.9/ I43.x/ I50.x/ P29.0
Obstructive sleep apnea	G4733/G4730/G4731/G4732/G4739
Smoking	F17/ F172/ F1720/ F17200/ F17201/ F17203/ F17208/ F17209/ F1721/ F17210/ F17211/ F17213/ F17218/ F17219/ F1722/ F17220/ F17221/ F17223/ F17228/ F17229/ F1729/ F17290/ F17291/ F17293/ F17298/ F17299/ Z87.891
Chronic heart failure	I50/ I501/ I502/ I5020/ I5021/ I5022/ I5023/ I503/ I5030/ I5031/ I5032/ I5033/ I504/ I5040/ I5041/ I5042/ I5043/ I508/ I5081/ I50810/ I50811/ I50812/ I50813/ I50814/ I5082/ I5083/ I5084/ I5089/ I509
Atrial Fibrillation	I48.91/ I48.92
Prior myocardial infarction	I252
Cardiogenic shock	R570
Endocarditis	A3951/ A5483/ B3321/ B376/ B394/ B395/ B399/ I011/ I330/ I339/ I38/ I39
Intracerebral Hemorrhage	I609/ I619/ I620/ I621/ I629
Chronic obstuctive pulmonary disease	I278/ I279/ J40/ J41/ J42/ J43/ J44/ J45/ J46/ J47/ J60/ J61/ J62'/J63/ J64/ J65/ J66/ J67/ J684/ J701/ J703
Diabetes	E100/ E101/ E106/ E108/ E109/ E110/ E111/ E116/ E118/ E119/ E120/ E121/ E126/ E128/ E129/ E130/ E131/ E136/ E138/ E139/ E140/ E141/ E146/ E148/ E149
Obesity	E66.x
Syncope	R55
Dyslipidemia	E78.4/ E78.5
Acute kidney injury	N170/ N171/ N172/ N178/ N179
Pneumonia	J18.0/ J18.1/ J18.2/ J18.8/ J18.9
Pulmonary embolism	I26.90/ I26.99/ T800XXA/ T81718A/ T8172XA/ T82817A/ T82818A
Sepsis	A021/ A227/ A267/ A327/ A400/ A401/ A403/ A408/ A409/ A4101/ A4102/A411/ A412/ A413/ A414/ A4150/ A4151/ A4152/ A4153/ A4159/ A4181/ A4189/ A419/ A427/ A5486/ B377/T8144XA/T8144D/T8144S/R6520/R6521
Postoperative bleeding	D62
Gastrointestinal bleeding	K2211/ K250/ K252/ K254/ K256/ K2901/ K2921/ K2931/ K2941/ K2951/ K2961/ K2971/ K2981/ K2991/ K260/ K262/ K264/ K266/ K270/ K272/ K274/ K276/ K5701/ K5711/ K5713/ K5721/ K5731/ K5733/ K5741/ K5751/ K5753/ K5781/ K5791/ K5793/ K51011/ K51211/ K51311/ K51411/ K51511/ K51811/ K51911/ K50011/ K50111/ K50811/ K50911/ K625/ K5521/ K280/ K282/ K284/ K286/ K920/ K921/ K922
Hematuria	R310/ R319
Cardiogenic shock	R570
Respiratory failure	J9500/ J9501/ J9502//J9503/J9504/J9509/J951/J952/J953/J954/J9561/J9562/J9571/J9572/J95811/J95812/J95821/J95822/J95830/J95831/J9584/J95850/J95851/J95859/J95859/J95860/J95861/J95862/J95863/J9588/J9589
Skin infection	L00/ L0100/ L0101/ L0102/ L0103/ L0109/ L011/ L0201/ L0202/ L0203/ L0211/ L0212/ L0213/ L02211/ L02212/ L02213/ L02214/ L02215/ L02216/ L02219/ L02221/ L02222/ L02223/ L02224/ L02225/ L02226/ L02229/ L02231/ L02232/ L02233/ L02234/ L02235/ L02236/ L02239/ L0231/ L0232/ L0233/ L02411/ L02412/ L02413/ L02414/ L02415/ L02416/ L02419/ L02421/ L02422/ L02423/ L02424/ L02425/ L02426/ L02429/ L02431/ L0…
Thrombocytopenia	D693/ D6941/ D6942/ D6949/ D6951/ D6959/ D696
Acute bronchitis	J200/ J201/ J202/ J203/ J204/ J205/ J206/ J207/ J208/ J209/ J210/ J211/ J218/ J219/ J40
Rheumatic heart disease	I099/I019/I018/I09/I0989/I2722/I00/I0981/I020/I059/I069/I079/I509/I501/I080/I081/I082/I011/I012/I058/I083/I088/I50810/I50814/I5082/I5089/I50811/I50812/I5083/I5084/I5020/I5021/I5022/I5030/I5031/I5032/I50813/I5023/I5033/I5042/I5040/I5041/I5043/A0100/F458/I341/I3.49
pulmonary hypertension	I27/I260
Prior stroke	Z8673
Previous percutaneous coronary intervention	Z9861/Z9861
Previous myocardial Infarction	I252
Previous coronary artery bypass grafting	Z951
Postprocedural cardiogenic shock	T8111/T8111XA/T8111XD/T8111XS
Peripheral vascular disease	I70/I71/I731/I738/I738/I771/I790/I792/K551/K558/K559/Z958/Z959
Bariatric surgery	Z9884
Morbid obesity	Z684/E6601/E662
Type 2 diabetes mellitus	E11
Alcohol use	F101/ F1010/ F1011/ F1012/ F10120/ F10121/ F10129/ F1014/ F1015/ F10150/ F10151/ F10159/ F1018/ F10180/ F10181/ F10182/ F10188/ F1019/ F102/ F1020/ F1021/ F1022/ F10220/ F10221/ F10229/ F1023/ F10230/ F10231/ F10232/ F10239/ F1024/ F1025/ F10250/ F10251/ F10259/ F1026/ F1027/ F1028/ F10280/ F10281/ F10282/ F10288/ F1029/ F10920/ F10921/ F10929/ F1094/ F1095/ F10950/ F10951/ F10959/ F1096/ F1097/ …
Anemia	D460/ D461/ D4620/ D4621/ D4622/ D464/ D500/ D508/ D509/ D510/ D511/ D513/ D518/ D519/ D520/ D521/ D528/ D529/ D530/ D531/ D532/ D538/ D539/ D550/ D551/ D552/ D553/ D558/ D559/ D588/ D589/ D590/ D591/ D5910/ D5911/ D5912/ D5913/ D5919/ D592/ D594/ D598/ D599/ D6109/ D611/ D612/ D613/ D6189/ D619/ D62/ D630/ D631/ D638/ D640/ D641/ D642/ D643/ D644/ D6481/ D6489/ D649/ D75A/ O368210/ O368211/ O368…
